# Supplementary material for: Predictive Performance and Clinical Application of PRS-15 for Venous Thromboembolism Risk in Chinese Orthopedic Patients: A Multicenter Prospective Case-Control Study
Source: Research Square preprint supplement (doi:10.21203/rs.3.rs-8190841/v1), 2026-02-19
Supplement: Supplementary file 1 [file e93ebc8059729a39f27684cc.docx]

**Predictive Performance and Clinical Application of PRS-15 for Venous Thromboembolism Risk in Chinese Orthopedic Patients: A Multicenter Prospective Case-Control Study**

Jiaxuan Hou1, Jiawei Zhang1, Chao Liu1, Huijun Yuan2, Liming Yu3, Jiancang Ma4, Jizhou Geng5, Zhipeng Hu6, Hong Zhang7, Ye Tian8, Hui Shang9, Xuefei Mao10, Hui Quan11, Xuegang Wang12, Yong Qiao13, Wujun Li14, Liang Wang15, Qiang Yin16, Hao Wu1, Jiayan Li1, Chuangzhou Xie17, Huaping Wu18, Wenyong Zhang19, Wei Hong20, Xiaohong Meng21*, Shengying Qin22*, Shaoying Lu1*

**Affiliations:**

1. Department of Vascular Surgery, The First Affiliated Hospital of Xi’an Jiaotong University, Xi’an, Shaanxi, 710061, China
2. Department of Vascular Surgery, Honghui Hospital, Xi'an JiaoTong University College of Medicine, Xi'an, Shaanxi, China
3. Department of Vascular Surgery, Xi'an Daxing Hospital, Xi'an, Shannxi, China
4. Department of Vascular Surgery, The Second Affiliated Hospital of Xi’an Jiaotong University, Xi’an, Shaanxi, 710004, China
5. Department of Intervention, Yan'an People's Hospital, Yan'an, Shaanxi, China
6. Department of Vascular Surgery, The General Hospital of NingXia Medical University, Yinchuan, 750004, China
7. Department of Vascular Surgery, Shaanxi Provincial People's Hospital, Xi'an, Shaanxi Province 710068, China
8. Department of Vascular Surgery, The First Affiliated Hospital of Xinjiang Medical University, Urumqi, China
9. Department of Spine Surgery, Taihe Hospital of Shiyan City, Hubei Province, China
10. Department of Surgery, Xi'an Hospital of Traditional Chinese Medicine, Xi'an, China
11. Department of Interventional Vascular Surgery, Baoji Central Hospital, Baoji, Shaanxi Province 721008, China
12. Department of Vascular Surgery, Mianyang Central Hospital, Sichuan Province, China
13. Department of Vascular Surgery, Sichuan Provincial Orthopedic Hospital, Chengdu, Sichuan Province, China
14. Department of General Surgery, the First Affiliated Hospital of Xi'an Medical University, 48 Fenghao West Road, Xi'an, Shaanxi, 710077, PR China
15. Department of Vascular Surgery, Chengdu Integrated TCM&Western Medicine Hospital, Chengdu, Sichuan Province, China
16. Department of Vascular Surgery, the Second Affiliated Hospital of Xi'an Medical University, Xi'an, Shaanxi, 710077, PR China
17. Department of Vascular Surgery, Shaanxi Forestry Workers' Hospital, Xi'an, Shaanxi, China
18. Department of Vascular Surgery, Dazhou Central Hospital, Dazhou, Sichuan Province, China
19. Department of General Surgery, Shangluo Central Hospital, Shangluo, Shaanxi, China
20. Department of General Surgery, Ankang Central Hospital, Ankang, Shaanxi, China
21. Xi 'an Agen Medicine Technology Co., Ltd, Xi'an, Shaanxi, China
22. Key Laboratory for the Genetics of Developmental and Neuropsychiatric Disorders (Ministry of Education), Bio-X Institutes, Shanghai Jiao Tong University, Shanghai, China

* Authors for correspondence

Xiaohong Meng

Email address: mengxiaohong@agen.com.cn

Shengying Qin (ORCID: 0000-0003-3822-3966)

Email address: chinsir@sjtu.edu.cn.

Shaoying Lu (ORCID: 0000-0002-0309-5151)

Email address: robertlu@mail.xjtu.edu.cn

**Method**

**Attachment 1**

**VTE Comprehensive Risk Assessment Automated Data Processing Program Algorithm**

**Step 1:** Load the case-control group VTE-PRS-15 value data and Caprini score data.

**Step 2:** Invoke the VTE-PRS-15B+Caprini data analysis module.

**Step 3:** Within the VTE-PRS-15 value data range, set a step size of 0.005 and calculate the sample risk results under each risk genetic threshold.

**Step 4:** For each genetic risk threshold, apply 4 predefined qualitative combination strategies,and count the number of "DVT" and "non-DVT" patients in the high, medium, and low-risk groups under each strategy.

**Step 5:** Export the statistical dataset generated by the VTE-PRS-15B+Caprini data analysis module to an Excel file.

**Step 6:** Invoke the VTE-PRS-15T+Caprini data analysis module.

**Step 7:** Within the VTE-PRS-15 value data range, set a step size of 0.01 and calculate the sample risk results under each genetic risk threshold.

**Step 8:** For each genetic risk threshold, apply 432 predefined qualitative combination strategies, and count the number of "DVT" and "non-DVT" patients in the high, medium, and low-risk groups under each strategy.

**Step 9:** Export the statistical dataset generated by the VTE-PRS-15T+Caprini data analysis module to an Excel file.

**Step 10:** Invoke the logistic regression reconstruction model data analysis module.

**Step 11:** Perform a double loop iteration over paired low-risk thresholds and high-risk thresholds (range 0-1).

**Step 12:** For each pair of risk thresholds, classify the results into "high-risk", "medium-risk"and "low-risk" groups based on the logistic regression reconstruction model, and count the number of "DVT" and "non-DVT" patients in each group.

**Step 13:** Export the statistical dataset generated by the logistic regression reconstruction model data analysis module to an Excel file.

**Core code**

*// VTE Comprehensive Risk Assessment Automated Data Processing Core Code (Java)
//
//* *Algorithm A: Core Algorithm for the Binary Qualitative Combination Analysis Module
// This algorithm iterates through binary cutoffs for VTE-PRS-15B and combines them with Caprini scores for patient risk stratification.
//
// @param allPatients List of patient data
// @param workbook The workbook to store the results in***private static void** runBinaryAnalysis(List<Patient> allPatients, Workbook workbook) {
*// Define the iteration range and step for the VTE-PRS-15 score cutoff (0.68 to 5.78, step 0.005)***final** BigDecimal CUTOFF_START = **new** BigDecimal(**"0.68"**);
**final** BigDecimal CUTOFF_END = **new** BigDecimal(**"5.78"**);
**final** BigDecimal CUTOFF_STEP = **new** BigDecimal(**"0.005"**);

 *// Define the mapping for four qualitative combination strategies* Map<String, String[]> strategyMappings = **new** HashMap<>();
 strategyMappings.put(**"HIGH_High"**, **new** String[]{FINAL_HIGH_RISK, FINAL_HIGH_RISK, FINAL_HIGH_RISK, FINAL_HIGH_RISK});
 *// ... (rest of the combinations are omitted for brevity)* List<Map<String, Object>> allResults = **new** ArrayList<>();
 *// Iterate through all possible VTE-PRS-15 cutoffs* **for** (BigDecimal currentCutoffBD = CUTOFF_START; currentCutoffBD.compareTo(CUTOFF_END) <= 0; currentCutoffBD = currentCutoffBD.add(CUTOFF_STEP)) {
 **double** currentCutoff = currentCutoffBD.doubleValue();

 Map<String, **long**[]> counts = **new** HashMap<>();
 **for** (**int** i = 1; i <= 4; i++) {
 counts.put(**"QualitativeCombination"** + i, **new long**[6]);
 }

 *// Iterate through each patient, calculating risk stratification based on the current cutoff and strategies* **for** (Patient p : allPatients) {
 String capriniLvl = p.capriniCategory.name();
 String vte15Lvl = (p.vte15Score >= currentCutoff) ? **"High"** : **"Low"**;
 String key = capriniLvl + **"_"** + vte15Lvl;

 String[] finalRisks = strategyMappings.get(key);
 **if** (finalRisks != **null**) {
 **for** (**int** i = 0; i < finalRisks.length; i++) {
 **long**[] currentCounts = counts.get(**"QualitativeCombination"** + (i + 1));
 **boolean** isDvt = p.group.equals(DVT_GROUP);
 *// Update counters based on the final risk level* **if** (finalRisks[i].equals(FINAL_HIGH_RISK)) {
 currentCounts[isDvt ? 0 : 1]++;
 } **else if** (finalRisks[i].equals(FINAL_MEDIUM_RISK)) {
 currentCounts[isDvt ? 2 : 3]++;
 } **else if** (finalRisks[i].equals(FINAL_LOW_RISK)) {
 currentCounts[isDvt ? 4 : 5]++;
 }
 }
 }
 }

 *// Calculate and store results* **for** (**int** i = 1; i <= 4; i++) {
 String strategyName = **"QualitativeCombination"** + i;
 **long**[] currentCounts = counts.get(strategyName);
 **long** increase = calculateCorrectClassificationIncrease(currentCounts[0], currentCounts[1], currentCounts[4], currentCounts[5]);
 Map<String, Object> resultRow = **new** LinkedHashMap<>();
 resultRow.put(**"StrategyName"**, strategyName);
 resultRow.put(**"CutoffValue"**, String.format(**"%.3f"**, currentCutoff));
 resultRow.put(**"IncreaseInCorrectlyClassifiedCases"**, increase);
 allResults.add(resultRow);
 }
 }
 *// Write results to the worksheet* writeResultsToSheet(workbook, **"BinaryAnalysisResults"**, allResults);
 }

*// Algorithm B: Core Algorithm for the Ternary Qualitative Combination Analysis Module
// This algorithm evaluates all possible combination strategies by iterating through dual cutoffs for VTE-PRS-15T and combining them with Caprini scores.
//
// @param allPatients List of patient data
// @param workbook The workbook to store the results in***private static void** runTernaryAnalysis(List<Patient> allPatients, Workbook workbook) {
*// Define VTE-PRS-15 dual cutoff iteration parameters (step 0.05, range 0.680 to 5.780)***final** BigDecimal CUTOFF_INCREMENT = **new** BigDecimal(**"0.05"**);
**final** BigDecimal MIN_LOW_CUTOFF = **new** BigDecimal(**"0.680"**);
**final** BigDecimal MAX_HIGH_CUTOFF = **new** BigDecimal(**"5.780"**);

 List<Map<String, Object>> allFilteredResults = **new** ArrayList<>();
 *// Nested loop: Iterate through low and high risk cutoffs* **for** (BigDecimal lowCutoff = MIN_LOW_CUTOFF; lowCutoff.compareTo(MAX_LOW_CUTOFF) <= 0; lowCutoff = lowCutoff.add(CUTOFF_INCREMENT)) {
 **for** (BigDecimal highCutoff = lowCutoff.add(CUTOFF_INCREMENT); highCutoff.compareTo(MAX_HIGH_CUTOFF) <= 0; highCutoff = highCutoff.add(CUTOFF_INCREMENT)) {

 *// Aggregate patient counts* Map<BaseCombination, **long**[]> aggregatedCounts = aggregateTernaryCounts(allPatients, lowCutoff.doubleValue(), highCutoff.doubleValue(), ORDERED_BASE_COMBINATIONS);

 *// Iterate through all possible strategy combinations (3^9 = 19683)* **long** totalPossibleStrategies = (**long**) Math.pow(FinalRiskCategory.values().length, ORDERED_BASE_COMBINATIONS.size());
 **for** (**long** i = 0; i < totalPossibleStrategies; i++) {
 FinalRiskCategory[] currentRules = decodeStrategy(i);
 *// Calculate risk stratification statistics for the current strategy* **long**[] counts = **new long**[6];
 **for** (**int** k = 0; k < ORDERED_BASE_COMBINATIONS.size(); k++) {
 BaseCombination bc = ORDERED_BASE_COMBINATIONS.get(k);
 FinalRiskCategory rule = currentRules[k];
 **long**[] baseCounts = aggregatedCounts.get(bc);
 *// Accumulate counts based on the rule* **if** (baseCounts != **null**) {
 **switch** (rule) {
 **case** HIGH_RISK:
 counts[0] += baseCounts[0]; counts[1] += baseCounts[1]; **break**;
 **case** MEDIUM_RISK:
 counts[2] += baseCounts[0]; counts[3] += baseCounts[1]; **break**;
 **case** LOW_RISK:
 counts[4] += baseCounts[0]; counts[5] += baseCounts[1]; **break**;
 }
 }
 }

 *// Calculate and store results* **long** increase = calculateCorrectClassificationIncrease(counts[0], counts[1], counts[4], counts[5]);
 StringBuilder strategyDefStr = **new** StringBuilder();
 **for** (FinalRiskCategory rule : currentRules) {
 strategyDefStr.append(rule.getShortLabel());
 }
 Map<String, Object> resultRow = **new** LinkedHashMap<>();
 resultRow.put(**"StrategyDefinition"**, **"QualitativeCombination ("** + strategyDefStr.toString() + **")"**);
 resultRow.put(**"LowRiskCutoff"**, lowCutoff.setScale(3, RoundingMode.HALF_UP).toPlainString());
 resultRow.put(**"HighRiskCutoff"**, highCutoff.setScale(3, RoundingMode.HALF_UP).toPlainString());
 resultRow.put(**"IncreaseInCorrectlyClassifiedCases"**, increase);
 allFilteredResults.add(resultRow);
 }
 }
 }
 *// Write results to the worksheet* writeResultsToSheet(workbook, **"TernaryAnalysisResults"**, allFilteredResults);
 }

*// Algorithm C: Core Algorithm for the Logistic Regression Analysis Module
// This algorithm stratifies risk based on model-predicted probabilities using dual cutoffs for High/Medium/Low risk.
//
// @param allPatients List of patient data
// @param workbook The workbook to store the results in***private static void** runLogisticRegressionAnalysis(List<Patient> allPatients, Workbook workbook) {
 List<Map<String, Object>> allResults = **new** ArrayList<>();
 *// Define probability cutoff iteration parameters (range 0.00 to 1.00, step 0.01)* BigDecimal lowCutoffStart = **new** BigDecimal(**"0.00"**);
 BigDecimal lowCutoffEnd = **new** BigDecimal(**"0.99"**);
 BigDecimal cutoffStep = **new** BigDecimal(**"0.01"**);

 *// Nested loop: Iterate through low and high risk probability cutoffs* **for** (BigDecimal lowCutoffBD = lowCutoffStart; lowCutoffBD.compareTo(lowCutoffEnd) <= 0; lowCutoffBD = lowCutoffBD.add(cutoffStep)) {
 **for** (BigDecimal highCutoffBD = lowCutoffBD.add(cutoffStep); highCutoffBD.compareTo(**new** BigDecimal(**"1.00"**)) <= 0; highCutoffBD = highCutoffBD.add(cutoffStep)) {
 **double** lowCutoff = lowCutoffBD.doubleValue();
 **double** highCutoff = highCutoffBD.doubleValue();

 **long**[] counts = **new long**[6];
 *// Iterate through patients, stratifying risk level by predicted probability* **for** (Patient p : allPatients) {
 **double** prob = p.modelProbability;
 **boolean** isDvt = p.group.equals(DVT_GROUP);

 *// Update counts based on the probability range* **if** (prob >= highCutoff) {
 counts[isDvt ? 0 : 1]++;
 } **else if** (prob <= lowCutoff) {
 counts[isDvt ? 4 : 5]++;
 } **else** {
 counts[isDvt ? 2 : 3]++;
 }
 }

 *// Calculate and store results* **long** increase = calculateCorrectClassificationIncrease(counts[0], counts[1], counts[4], counts[5]);
 Map<String, Object> resultRow = **new** LinkedHashMap<>();
 resultRow.put(**"ModelType"**, **"Logistic Regression Model"**);
 resultRow.put(**"HighRiskProbabilityCutoff"**, String.format(**"%.3f"**, highCutoff));
 resultRow.put(**"LowRiskProbabilityCutoff"**, String.format(**"%.3f"**, lowCutoff));
 resultRow.put(**"IncreaseInCorrectlyClassifiedCases"**, increase);
 allResults.add(resultRow);
 }
 }
 *// Write results to the worksheet* writeResultsToSheet(workbook, **"LogisticRegressionAnalysisResults"**, allResults);
 }

**Attachment 2**

K-Means Clustering Algorithm

Step 1:Four ideal points are established as benchmarks. These points represent theoretical perfect outcomes: 100% recognition rate for DVT (1013 cases) in the high-risk group, 0% for non-DVT in the high-risk group, 100% for non-DVT (1025 cases) in the low-risk group, and 0% for DVT in the low-risk group.

Step 2: The program reads a data file line by line, extracting the numerical values from the first four columns of each row. These values correspond to the number of DVT cases in the high-risk group, non-DVT cases in the high-risk group, non-DVT cases in the low-risk group, and DVT cases in the low-risk group, respectively. Together, these four values constitute a single four-dimensional data point.

Step 3: A custom data structure, ClusterPoint, is created to encapsulate the four-dimensional numerical data (referred to as point) and its corresponding original row number (originalRowNum) from the input file. This process forms a complete dataset for analysis, preserving a reference to the source data.

Step 4: The mean (μ) and standard deviation (σ) are calculated for each of the four dimensions (i.e., for each column) across the entire dataset.

Step 5: Each data point in the dataset undergoes standardization. The value in each dimension of a point is transformed using the formula: NewValue=(OriginalValue−Mean)/StandardDeviation. This is represented as P′=[(x1​−μ1​)/σ1​,(x2​−μ2​)/σ2​,(x3​−μ3​)/σ3​,(x4​−μ4​)/σ4​], where μ is the mean and σ is the standard deviation for each respective dimension.

Step 6:The number of clusters, k, is determined automatically using the heuristic rule k=sqrt（n/2）​, where n is the total number of data points. The KMeansPlusPlusClusterer is then employed to intelligently initialize the initial cluster centers (centroids).

Step 7: An iterative process begins where each data point is assigned to the cluster with the nearest centroid. Following the assignment, the centroid of each cluster is recalculated by taking the mean of all data points assigned to it.

Step 8: The process in Step 7 is repeated until the cluster assignments no longer change between iterations, indicating convergence. At this point, all data points are partitioned into k distinct clusters, with each cluster comprising a group of data points that are in close proximity to one another in the feature space.

Step 9: The distance between the centroid of each of the k clusters and the predefined "ideal point" is calculated. The cluster whose centroid is closest to the "ideal point" is identified and designated as the "optimal cluster".

Step 10: A search is conducted exclusively within the "optimal cluster". The algorithm iterates through every ClusterPoint object in this cluster, calculating the distance of each individual point from the "ideal point". The point with the minimum distance is identified as the "optimal data point".

Step 11: The program outputs the detailed information of the identified "optimal data point".

**Core code**

*// Core Algorithm for the K-Means Clustering Analysis Module
// This algorithm reads data from an Excel file, standardizes it, performs K-Means++ clustering, and finds the optimal data point closest to an ideal point.
//
// @param args The command-line arguments***public static void** main(String[] args) {
 *// Store all valid data points read from the file* List<ClusterPoint> allPoints = **new** ArrayList<>();
 *// Define the ideal data point, used as a reference standard* **double**[] idealPoint = {1013, 0, 1025, 0};
 *// Path to the Excel file to be processed* String fileName = **"g:/data.xlsx"**;
 **int** dimensions = 4; *// Define the number of dimensions/columns* **try** {
 *// Read the data points from the Excel file* allPoints = readDataPointsFromExcel(fileName, dimensions);
 } **catch** (IOException e) {
 *// Handle exceptions related to file reading* System.err.println(**"Error processing file "** + fileName + **": "** + e.getMessage());
 e.printStackTrace();
 **return**;
 }

 **if** (allPoints.isEmpty()) {
 System.out.println(**"No valid data found in the file!"**);
 **return**;
 }

 *// Standardize the data to eliminate the influence of different scales* standardizeData(allPoints);

 *// Calculate the number of clusters k* **int** k = Math.max(2, (**int**) Math.sqrt(allPoints.size() / 2.0));
 *// Create a KMeans++ clusterer* KMeansPlusPlusClusterer<ClusterPoint> clusterer = **new** KMeansPlusPlusClusterer<>(
 k, 100, **new** EuclideanDistance()
 );

 *// Perform clustering analysis* List<CentroidCluster<ClusterPoint>> clusters = clusterer.cluster(allPoints);

 *// Find the cluster closest to the ideal point* CentroidCluster<ClusterPoint> bestCluster = findNearestCluster(clusters, idealPoint);
 *// Find the data point closest to the ideal point within the best cluster* ClusterPoint optimalPoint = findNearestPoint(bestCluster.getPoints(), idealPoint);

 *// Output the analysis results* System.out.println(**"\n===== Analysis Result ====="**);
 System.out.println(**"Source file of the optimal data: "** + optimalPoint.sourceFile);
 System.out.println(**"Row number in the source file: "** + optimalPoint.originalRowNum);
 System.out.println(**"Data point: "**);
 **for** (**int** i = 0; i < optimalPoint.point.length; i++) {
 System.out.printf(**"%.4f\t"**, optimalPoint.point[i]);
 }
 }

**Table S1. Distribution of Caprini Risk-Score Components in the Study Cohort.**

| **Risk Factors** | **Data** | **Group** | | **χ²/t** | **P** |
| --- | --- | --- | --- | --- | --- |
| **Case（1013)** | **Control（1025）** |
| Age(years) | 18-40 | 82 | 245 | 142.080 | <0.001 |
| 41-60 | 376 | 438 |
| 6174 | 420 | 266 |
| ≥75 | 127 | 63 |
| BMI＞25 | Yes | 364 | 275 | 19.618 | <0.001 |
| No | 649 | 750 |
| Swollen legs （Current） | Yes | 143 | 165 | 1.559 | 0.212 |
| No | 870 | 860 |
| Visible varicose veins | Yes | 5 | 2 | 1.326 | 0.285 |
| No | 1008 | 1023 |
| Existing lung disease | Yes | 5 | 0 | 5.072 | 0.030 |
| No | 1008 | 1025 |
| On bed rest or restricted mobility for <72 hours | Yes | 68 | 97 | 5.181 | 0.023 |
| No | 945 | 928 |
| History of unexplained stillborn infant, recurrent spontaneous abortion | Yes | 0 | 1 | 0.989 | 1.000 |
| No | 1013 | 1024 |
| arthroscopic surgery | Yes | 48 | 59 | 1.061 | 0.303 |
| No | 965 | 966 |
| Surgery  （＞45min） | Yes | 771 | 733 | 5.571 | 0.018 |
| No | 242 | 292 |
| Current or past malignancy | Yes | 2 | 4 | 0.645 | 0.687 |
| No | 1011 | 1021 |
| Immobilizing plaster cast in past 1 month | Yes | 66 | 149 | 34.738 | <0.001 |
| No | 947 | 876 |
| Central venous access | Yes | 5 | 0 | 5.072 | 0.300 |
| No | 1008 | 1025 |
| Hyperhomocysteinemia | Yes | 21 | 22 | 0.013 | 0.908 |
| No | 992 | 1003 |
| Personal or family history of increased risk of blood  clotting | Yes | 2 | 0 | 2.026 | 0.247 |
| No | 1011 | 1025 |
| Stroke（＜1month） | Yes | 1 | 0 | 1.012 | 0.497 |
| No | 1012 | 1025 |
| arthroplasty therapy (HRT) | Yes | 164 | 57 | 59.530 | <0.001 |
| No | 849 | 968 |
| Hip, pelvis, or leg fracture | Yes | 614 | 536 | 14.342 | <0.001 |
| No | 399 | 489 |
| Spinal cord injury（＜1 month） | Yes | 11 | 5 | 2.340 | 0.140 |
| No | 1002 | 1020 |
